# Supplementary material for: Photosynthetic characteristics of Paris polyphylla var. chinensis in response to different light intensities and soil water contents
Source: Front Plant Sci. 2025 Jan 23;15:1521714. doi: 10.3389/fpls.2024.1521714 (PMC11803506; doi:10.3389/fpls.2024.1521714)
Supplement: Supplementary file 1 [file Table1.xlsx]

## Sheet: use
日动态数据整理	0.2			0.4			0.6				0.2	0.4	0.6		处理数据	日动态数据整理	0.2			0.4			0.6				0.2	0.4	0.6
A	average	osd	sd	average	osd	sd	average	osd	sd	WUE						A	average	osd	sd	average	osd	sd	average	osd	sd	WUE
8	0.757748	0.463189	0.482102	1.34942	0.575457	0.601045	1.34465	1.07309	1.12547		-3.41274	-2.89045	-3.44487			8	0.740571	0.282379	0.30933	1.0825	0.287176	0.314586	0.767951	0.71696	0.78539		-2.53091	-1.98445	-2.56897
10	2.18276	0.496466	0.523321	2.61919	0.537091	0.620179	3.21701	0.730617	0.76045		13.3725	19.5777	10.8038			10	2.10082	0.166487	0.182378	2.59568	0.446965	0.489625	2.69849	0.450255	0.486331		34.2469	52.3681	10.5717
12	0.884727	0.542164	0.559945	2.22049	0.574104	0.599632	2.24932	0.530319	0.562488		-2.08657	-11.6567	-5.2093			12	0.926491	0.367374	0.402438	2.22906	0.24276	0.26593	2.18904	0.350958	0.384456		-4.49501	-19.7323	-3.6333
14	0.526042	0.468745	0.497179	1.38607	0.599245	0.613347	1.63193	0.42076	0.432958		4.20845	5.95398	2.32909			14	0.737272	0.441343	0.483467	1.69901	0.339479	0.37188	1.81893	0.290337	0.318048		3.34971	5.95695	2.3295
16	0.632601	0.293146	0.306181	1.17286	0.337377	0.349219	1.76279	0.418062	0.431772		5.15141	5.56717	3.40477			16	0.651764	0.287509	0.31495	1.18779	0.182248	0.199643	1.85993	0.30357	0.339401		4.0655	5.19112	3.14825
18	-0.8736	0.226178	0.235414	-1.03368	0.34452	0.613347	-1.04081	0.22178	0.230152		2.20738	2.43454	3.46981			18	-0.753815	0.0927921	0.101649	-0.829346	0.0960829	0.37188	-1.04029	0.142457	0.153872		1.86936	2.3132	3.91238
Emm																Emm
6	-0.959488		0.546301	-0.820982		0.51748	-0.698353		0.532734							6
8	-0.222035	0.112576	0.117173	-0.466855	0.164242	0.171545	-0.390333	0.188708	0.197919							8	-0.29261	0.114976	0.12595	-0.545492	0.136907	0.149974	-0.298933	0.0992297	0.108701
10	0.163228	0.216882	0.228614	0.133784	0.119021	0.137433	0.297767	0.255013	0.265426							10	0.0613432	0.123442	0.135224	0.0495661	0.156774	0.171738	0.255255	0.200529	0.216596
12	-0.424011	0.367359	0.379407	-0.190491	0.384599	0.401701	-0.431789	0.38012	0.403178							12	-0.206115	0.155878	0.170756	-0.112965	0.186722	0.204544	-0.602493	0.311738	0.341492
14	0.124997	0.160745	0.170495	0.232797	0.156879	0.16057	0.700675	0.251568	0.258862							14	0.2201	0.0995151	0.109013	0.285215	0.0663431	0.0726752	0.780826	0.133235	0.145951
16	0.122802	0.218584	0.228304	0.210675	0.212792	0.220261	0.51774	0.258198	0.266666							16	0.160316	0.117248	0.128439	0.228812	0.0869535	0.0952528	0.590781	0.085522	0.0956165
18	-0.395763	0.365456	0.380379	-0.42459	0.365364	0.16057	-0.299963	0.380196	0.394548							18	-0.403248	0.200791	0.219955	-0.358528	0.112684	0.0726752	-0.265899	0.145043	0.156665
Ci																Ci
8	average	osd		average	osd		average	osd								8
10	425.068	18.3936		428.357	15.8449		424.935	17.92								10
12	378.428	19.9178		370.627	7.38106		366.103	23.1362								12
14	415.962	17.2315		421.073	17.718		473.771	21.6213								14
16	354.617	19.354		293.946	15.5805		312.986	18.2952								16
18	383.253	17.1834		279.277	11.9939		291.85	19.0736								18
	359.129	18.6357		347.99	16.944		354.324	18.3537
gsw																gsw
6	-0.0982958		0.0545143	-0.0731834		0.0446391	-0.0563892		0.0412587							6
8	-0.0239217	0.011995	0.0124848	-0.0472931	0.0164696	0.017202	-0.0370945	0.0175554	0.0184123							8	-0.0315034	0.0122325	0.0134	-0.0544496	0.0126898	0.013901	-0.0286454	0.00956842	0.0104817
10	0.00831176	0.0111786	0.0117833	0.00662304	0.00595207	0.00687286	0.0146904	0.0124817	0.0129913							10	0.00309782	0.00622996	0.00682458	0.00246927	0.00776568	0.00850687	0.0126861	0.00984384	0.0106326
12	-0.0151913	0.0216911	0.0222855	-0.0113446	0.0195087	0.0203053	-0.018258	0.0160667	0.0170413							12	-0.0087653	0.00662881	0.0072615	-0.00465429	0.00774488	0.00848409	-0.0254759	0.0129847	0.014224
14	0.00416621	0.00535894	0.00568401	0.008853	0.00614512	0.00628973	0.0275732	0.0101485	0.0104427							14	0.00735727	0.00323952	0.00354872	0.0107297	0.0027448	0.00300678	0.0308068	0.00551239	0.00603852
16	0.00461939	0.00835547	0.008727	0.00855212	0.00866955	0.00897384	0.0222639	0.0112643	0.0116338							16	0.00604711	0.00433839	0.00475246	0.00926577	0.00350425	0.00383871	0.0253739	0.00393113	0.00439514
18	-0.0217428	0.0199851	0.0208011	-0.023163	0.0199312	0.00628973	-0.0167533	0.0212615	0.0220641							18	-0.0222873	0.0110052	0.0120556	-0.0196375	0.00602345	0.00300678	-0.0152899	0.00840049	0.00907357
fv/fm																fv/fm
6	0.7751		0.0137392	0.7939		0.016428	0.7963		0.02038							6	0.7751		0.0137392	0.7939		0.016428	0.7963		0.02038
8	0.7077		0.0440733	0.6688		0.0533725	0.6819		0.0356603							8	0.7077		0.0440733	0.6688		0.0533725	0.6819		0.0356603
10	0.6401		0.0537431	0.6697		0.0371036	0.6607		0.0554097							10	0.6401		0.0537431	0.6697		0.0371036	0.6607		0.0554097
12	0.6878		0.0420471	0.7015		0.0407438	0.6873		0.0368059							12	0.6878		0.0420471	0.7015		0.0407438	0.6873		0.0368059
14	0.6678		0.0336115	0.7415		0.057163	0.7304		0.0508357							14	0.6678		0.0336115	0.7415		0.057163	0.7304		0.0508357
16	0.7096		0.0461717	0.7514		0.0164803	0.7579		0.0159614							16	0.7096		0.0461717	0.7514		0.0164803	0.7579		0.0159614
18	0.7674		0.0152985	0.771		0.0198102	0.7883		0.012919							18	0.7674		0.0152985	0.771		0.0198102	0.7883		0.012919
光响应
µmol m⁻² s⁻¹	average	ｏｓｄ	ｓｄ
20%	-1.43048	0.686378	0.840638
	0.454112	0.330339	0.404581
	0.958527	0.461277	0.564947
	1.02354	0.451279	0.552702
	1.09006	0.469007	0.574414
	1.22067	0.284175	0.348042
	1.18331	0.353014	0.432352
	1.147	0.40159	0.491845
	1.07444	0.428423	0.524708
	0.730688	0.287594	0.352229
	0.374397	0.194657	0.238406
	-1.05358	0.369251	0.452238
40%	-1.72475	0.813054	0.995784
	1.80205	1.25816	1.54093
	2.79378	1.0921	1.33755
	3.02814	0.981777	1.20243
	3.02914	1.05764	1.29533
	3.0267	0.943074	1.15502
	2.86309	0.789361	0.966765
	2.91073	0.727059	0.890461
	2.55312	0.755264	0.925005
	1.7357	0.416047	0.509551
	0.702257	0.383121	0.469226
	-0.963527	0.22527	0.275898
60%	-1.89339	1.87466	2.29599
	2.28796	1.11617	1.36702
	2.2688	1.13968	1.39582
	2.30611	0.961641	1.17776
	2.24409	0.830708	1.0174
	2.32091	0.935632	1.14591
	2.16695	0.820958	1.00546
	2.125	0.821146	1.00569
	1.90715	0.605478	0.741556
	1.22725	0.538171	0.659122
	0.180406	0.551049	0.674895
	-1.90455	0.461297	0.564972
6.14							average	osd
叶重	控水	水温	叶片鲜重	叶片干重	含水量	含水率	叶片鲜重		叶片干重		含水量
	0.2	27℃	0.1906	0.048	0.1426	0.748164	0.208	0.0638592	0.0508571	0.00917183	0.157143	0.0549437
		37℃	0.2	0.052	0.148	0.74
		40℃	0.1744	0.049	0.1254	0.719037
		43℃	0.3622	0.072	0.2902	0.801215
		46℃	0.186	0.048	0.138	0.741935
		49℃	0.164	0.041	0.123	0.75
		51℃	0.1788	0.046	0.1328	0.742729
	0.4	27℃	0.5258	0.098	0.4278	0.813617	0.304957	0.116313	0.0655714	0.0161055	0.239386	0.100504
		37℃	0.1758	0.048	0.1278	0.726962
		40℃	0.384	0.071	0.313	0.815104
		43℃	0.3693	0.076	0.2933	0.794205
		46℃	0.2432	0.054	0.1892	0.777961
		49℃	0.2146	0.056	0.1586	0.739049
		51℃	0.222	0.056	0.166	0.747748
	0.6	27℃	0.1592	0.046	0.1132	0.711055	0.218071	0.0320829	0.055	0.00609449	0.163071	0.0269236
		37℃	0.2394	0.057	0.1824	0.761905
		40℃	0.1872	0.046	0.1412	0.754274
		43℃	0.2504	0.063	0.1874	0.748403
		46℃	0.2149	0.056	0.1589	0.739414
		49℃	0.2536	0.057	0.1966	0.775237
		51℃	0.2218	0.06	0.1618	0.729486
	苗圃（65%）	27℃	0.1561	0.035	0.1211	0.775785	0.205957		0.0521905		0.153767
		37℃	0.2317	0.069	0.1627	0.702201
		40℃	0.1162	0.032	0.0842	0.724613
		43℃	0.3744	0.068	0.3064	0.818376
		46℃	0.2845	0.069	0.2155	0.757469
		49℃	0.1498	0.043	0.1068	0.712951
		51℃	0.129	0.0493333	0.0796667	0.608622

## Sheet: daily variation
LI-6800	hhmmss	leaf	E蒸腾*1000	A净光合	gsw气孔导度	Qin外光强	Qabs叶光强																								#REF!
			mol m⁻² s⁻¹(mmol)	µmol m⁻² s⁻¹	mol m⁻² s⁻¹	µmol m⁻² s⁻¹	µmol m⁻² s⁻¹																								#REF!
2	cl-6	o-1	-0.239958	0.535625	-0.0274225	14.9313	12.5864																								#REF!
8	cl-6	o-2	-0.262214	0.437303	-0.027287	15.8764	13.3686																								#REF!
11	cl-6	o-3	-0.215395	0.440526	-0.0227747	25.6225	21.5841																								#REF!
12	cl-6	30-1	-0.220933	0.872979	-0.0234897	25.1167	21.1583													18点	0.2	0.160316	0.117248	0.128439	0.651764	0.287509	0.31495	0.00604711	0.00433839	0.00475246	4.0655
15	cl-6	30-2	-0.271428	1.01328	-0.029715	46.6726	39.3301														0.4	0.228812	0.0869535	0.0952528	1.18779	0.182248	0.199643	0.00926577	0.00350425	0.00383871	5.19112
18	cl-6	30-3	-0.545734	1.14371	-0.0583319	27.807	23.426														0.6	0.590781	0.085522	0.0956165	1.85993	0.30357	0.339401	0.0253739	0.00393113	0.00439514	3.14825
22	cl-6	50-1	-0.438445	1.2728	-0.0432877	51.655	43.53																								#REF!
27	cl-6	50-2	-0.535732	0.856975	-0.0532251	47.5357	40.0578																								#REF!
28	cl-6	50-3	-0.440069	1.05386	-0.0438115	48.3317	40.7282																								#REF!
29	cl-6	50-3	-0.768261	1.49976	-0.0771151	42.3948	35.7241																								#REF!
37	cl-6	70-3	-0.403507	1.19768	-0.0443057	97.8123	82.4413																								#REF!
39	cl-6	70-3	-0.68694	0.613938	-0.0649524	76.9484	64.853														0.2	-0.403248	0.200791	0.219955	-0.753815	0.0927921	0.101649	-0.0222873	0.0110052	0.0120556	1.86936
45	cl-6	80-2	-0.394001	0.274541	-0.0379976	136.366	114.941														0.4	-0.358528	0.112684	0.0726752	-0.829346	0.0960829	0.37188	-0.0196375	0.00602345	0.00300678	2.3132
49	cl-6	80-3	-0.388373	0.319993	-0.0389777	130.152	109.704														0.6	-0.265899	0.145043	0.156665	-1.04029	0.142457	0.153872	-0.0152899	0.00840049	0.00907357	3.91238
52	cl-6	90-1	-0.336246	0.193083	-0.0291174	145.385	122.545
56	cl-6	90-2	-0.136423	1.62634	-0.0134478	54.4552	45.8903
58	cl-6	90-2	-0.190281	1.9204	-0.0186952	53.9392	45.4559
61	cl-6	90-3	-0.348275	0.273351	-0.0336367	98.8863	83.3468
LI-6800	hhmmss	leaf	E蒸腾	A净光合	gsw气孔导度	Qin外光强	Qabs叶光强
			mol m⁻² s⁻¹	µmol m⁻² s⁻¹	mol m⁻² s⁻¹	µmol m⁻² s⁻¹	µmol m⁻² s⁻¹
2	cl-8	0-1	-0.994017	-7.81308	-0.110451	23.1938	19.5371
3	cl-8	0-1	-0.785226	-7.36646	-0.0877075	31.2562	26.3341
4	cl-8	0-1	-0.683403	-6.02796	-0.0760591	93.08	78.4515
5	cl-8	0-2	-0.648783	-5.57107	-0.0721116	86.9291	73.2664
6	cl-8	0-2	-2.38187	-7.81816	-0.241583	103.602	87.3212
7	cl-8	0-2	-1.09458	-5.01159	-0.115222	106.564	89.8185
8	cl-8	0-2	-0.711078	-4.59194	-0.0770404	99.0404	83.4759
10	cl-8	0-3	-1.90265	-9.11837	-0.207391	79.9616	67.3927
11	cl-8	0-3	-0.894019	-5.35882	-0.0993215	79.9647	67.3954
12	cl-8	0-3	-0.573198	-5.21979	-0.063808	79.1355	66.6961
13	cl-8	30-1	-0.532853	-5.04492	-0.0594382	79.1365	66.697
14	cl-8	30-1	-1.54997	-7.44196	-0.148232	87.1658	73.4659
15	cl-8	30-1	-0.951729	-5.74762	-0.0922923	82.5656	69.5876
16	cl-8	30-1	-0.756142	-5.75453	-0.074489	80.1731	67.571
18	cl-8	30-2	-1.33883	-6.12296	-0.126454	107.041	90.2207
19	cl-8	30-2	-0.756951	-5.05248	-0.073112	98.1558	82.7302
20	cl-8	30-2	-0.569289	-5.16958	-0.0551021	97.0737	81.8179
21	cl-8	30-3	-1.82106	-9.18287	-0.167817	91.2207	76.884
22	cl-8	30-3	-0.539525	-4.29259	-0.0524032	91.766	77.3436
23	cl-8	30-3	-0.370968	-3.8548	-0.0358869	93.6466	78.9292
24	cl-8	30-3	-0.293108	-3.52909	-0.0282893	99.5452	83.9018
26	cl-8	50-1	-1.5558	-4.57674	-0.139029	104.105	87.7452
27	cl-8	50-1	-0.823375	-3.66258	-0.0753618	110.578	93.2026
28	cl-8	50-1	-0.604311	-3.35293	-0.056034	111.379	93.8773
29	cl-8	50-2	-0.574461	-3.27395	-0.0532918	115.703	97.5223
30	cl-8	50-2	-2.47481	-6.31967	-0.211942	90.9356	76.6436
31	cl-8	50-2	-1.23315	-4.21756	-0.111384	87.7189	73.9323
32	cl-8	50-2	-0.831846	-3.75823	-0.0759644	83.6786	70.5258
34	cl-8	50-3	-1.04131	-3.97843	-0.0948427	41.9899	35.3828
35	cl-8	50-3	-0.654574	-3.88882	-0.0609225	69.1058	58.2415
36	cl-8	70-1	-0.537993	-3.03657	-0.0499137	88.4997	74.5905
37	cl-8	70-1	-1.30707	-4.54236	-0.114353	108.339	91.315
38	cl-8	70-1	-0.657968	-3.47101	-0.0576162	101.323	85.4005
39	cl-8	70-1	-0.499334	-3.23486	-0.0441454	104.011	87.6668
41	cl-8	70-2	-1.02837	-3.21684	-0.0901793	71.0016	59.8393
42	cl-8	70-2	-0.555833	-2.76419	-0.049383	65.9225	55.5576
43	cl-8	70-2	-0.424204	-2.60009	-0.037777	62.4314	52.6152
44	cl-8	70-3	-0.401447	-2.69578	-0.0357128	62.404	52.5913
45	cl-8	70-3	-0.573491	-2.50116	-0.0498995	75.881	63.9524
46	cl-8	70-3	-0.35765	-2.21724	-0.0312729	79.6551	67.1344
47	cl-8	70-3	-0.282655	-1.69016	-0.0246428	93.6251	78.9112
48	cl-8	80-1	-0.27307	-1.94648	-0.0237039	94.9321	80.0124
49	cl-8	80-1	-1.11191	-3.54815	-0.0929227	114.644	96.6301
50	cl-8	80-1	-0.56766	-2.32764	-0.0474876	114.912	96.8561
51	cl-8	80-1	-0.444668	-2.53454	-0.0377658	90.6797	76.4277
52	cl-8	80-2	-0.504886	-3.22361	-0.0430317	96.2969	81.163
53	cl-8	80-2	-0.698391	-2.26921	-0.060275	83.1446	70.0757
54	cl-8	80-2	-0.0841286	-1.10828	-0.00735923	83.9557	70.7595
55	cl-8	80-2	0.0482291	-1.07437	0.00423856	87.1911	73.4871
56	cl-8	80-3	0.131632	-0.889264	0.0114735	105.152	88.628
57	cl-8	80-3	-1.11123	-2.56116	-0.0908486	83.8615	70.6801
58	cl-8	80-3	-0.514504	-1.54164	-0.0429563	89.4934	75.4277
59	cl-8	80-3	-0.365539	-1.57352	-0.0305833	103.42	87.1677
60	cl-8	90-1	-0.356225	-1.65099	-0.0298591	100.224	84.474
61	cl-8	90-1	-2.14718	-5.2713	-0.162752	106.316	89.6094
62	cl-8	90-1	-1.02369	-3.00637	-0.0798917	108.641	91.5695
63	cl-8	90-1	-0.776868	-3.05876	-0.0620476	115.362	97.2347
64	cl-8	90-2	-0.74354	-2.79218	-0.0594791	106.891	90.0941
65	cl-8	90-2	-1.68346	-3.65223	-0.133219	19.6667	16.5641
66	cl-8	90-2	-0.838089	-1.98742	-0.0682493	61.8966	52.1635
67	cl-8	90-2	-0.575304	-1.94364	-0.04734	59.4435	50.096
68	cl-8	90-3	-0.530172	-1.6738	-0.0435033	71.2354	60.0364
69	cl-8	90-3	-1.51733	-3.27141	-0.119308	72.8593	61.4046
70	cl-8	90-3	-0.661381	-1.41751	-0.0533366	72.5875	61.1757
71	cl-8	90-3	-0.411114	-1.09572	-0.0331336	72.887	61.4288
LI-6800	hhmmss	leaf	E蒸腾	A净光合	gsw气孔导度	Qin外光强	Qabs叶光强
			mol m⁻² s⁻¹	µmol m⁻² s⁻¹	mol m⁻² s⁻¹	µmol m⁻² s⁻¹	µmol m⁻² s⁻¹
4	cl-10	0-1	0.239201	2.0556	0.0120171	210.297	177.265
7	cl-10	0-2	-0.0676806	2.04216	-0.00332107	245.973	207.34
8	cl-10	0-3	0.0908528	1.89536	0.0044604	234.407	197.59
10	cl-10	0-3	0.187945	2.23807	0.00963282	206.482	174.05
16	cl-10	30-2	-0.0923502	2.39297	-0.00469895	209.254	176.386
20	cl-10	30-3	0.0100909	1.98074	0.000496615	229.744	193.659
24	cl-10	50-1	0.0418193	2.15181	0.00202434	178.309	150.3
27	cl-10	50-2	0.097287	2.47188	0.00472884	178.352	150.336
29	cl-10	50-3	0.336981	3.52854	0.0167939	198.012	166.91
26	cl-10	50-2	-0.172226	2.50164	-0.00839562
34	cl-10	70-1	0.05905	2.32455	0.00294514	151.579	127.766
33	cl-10	70-1	-0.0655144	2.39446	-0.00328092
43	cl-10	80-1	0.135901	2.29092	0.00694493	180.973	152.545
44	cl-10	80-2	0.362495	2.81553	0.0188431	162.195	136.716
51	cl-10	80-3	0.523493	2.86539	0.0254972	277.427	233.856
53	cl-10	90-1	0.0383391	2.72306	0.00189806	189.115	159.408
54	cl-10	90-1	0.168798	2.21186	0.00835042	223.683	188.549
56	cl-10	90-2	0.532002	3.62479	0.0260108	200.302	168.84
60	cl-10	90-3	0.0257595	2.3579	0.00125858	224.624	189.344
LI-6800	hhmmss	leaf	E蒸腾*1000=Emm	A净光合	gsw气孔导度	Qin外光强	Qabs叶光强
			mol m⁻² s⁻¹(mmol)	µmol m⁻² s⁻¹	mol m⁻² s⁻¹	µmol m⁻² s⁻¹	µmol m⁻² s⁻¹
6	cl-12	0-1	-0.284191	1.3412	-0.0124214	101.717	85.7321
8	cl-12	0-2	-0.339223	1.49628	-0.0143712	219.296	184.851
14	cl-12	0-3	-0.346326	0.654446	-0.0147975	164.918	139.011
17	cl-12	44956	0.0160723	0.54056	0.000682662	163.049	137.435
21	cl-12	30-2	0.00782181	0.899022	0.000326809	220.987	186.277
25	cl-12	45015	-0.290847	0.627436	-0.0120111	261.526	220.451
30	cl-12	1950-02-01	-0.0355664	2.03529	-0.00151362	251.726	212.19
31	cl-12	1950-02-01	0.0922484	2.15008	0.00394217	252.876	213.16
36	cl-12	1950-03-01	-0.00966294	2.46571	-0.000403012	280.09	236.101
39	cl-12	1970-01-01	-0.0188087	2.5675	-0.000801657	250.349	211.029
42	cl-12	1970-02-01	-0.467709	1.86161	-0.0193907	258.666	218.04
45	cl-12	1970-03-01	-0.238293	2.29417	-0.00975889	302.563	255.046
47	cl-12	1980-01-01	-0.969964	2.46909	-0.0401272	245.262	206.741
48	cl-12	1980-01-01	-0.274463	2.50158	-0.0115227	239.152	201.59
54	cl-12	1980-03-01	-0.880861	1.62022	-0.0375309	183.279	154.49
55	cl-12	1980-03-01	-0.56279	1.80234	-0.0240673	184.614	155.615
58	cl-12	1990-01-01	-0.797135	2.26099	-0.0337784	337.873	284.812
61	cl-12	1990-02-01	-0.129742	2.48	-0.00582867	158.811	133.863
LI-6800	hhmmss	leaf	E蒸腾	A净光合	gsw气孔导度	Qin外光强	Qabs叶光强
			mol m⁻² s⁻¹	µmol m⁻² s⁻¹	mol m⁻² s⁻¹	µmol m⁻² s⁻¹	µmol m⁻² s⁻¹
2	cl-14	0-1	0.225282	0.632869	0.00763078	219.834	185.305
4	cl-14	0-1	0.2753	1.20816	0.00919181	231.823	195.411
7	cl-14	0-2	0.138451	1.46587	0.00479747	149.95	126.392
16	cl-14	30-2	0.0720064	0.324353	0.00247719	144.293	121.624
21	cl-14	30-3	0.386652	0.364268	0.0127567	134.329	113.225
22	cl-14	30-3	0.222909	0.428114	0.00728964	117.616	99.1352
27	cl-14	50-1	0.281022	1.44128	0.00953196	165.805	139.759
30	cl-14	50-2	0.229029	1.77541	0.00806145	159.642	134.563
36	cl-14	50-3	0.330241	1.18454	0.0128948	104.216	87.8396
41	cl-14	70-1	0.185589	1.59365	0.00719926	174.865	147.396
42	cl-14	70-2	0.391032	1.99355	0.0150505	146.517	123.499
46	cl-14	70-3	0.294376	2.20564	0.0116401	121.052	102.032
51	cl-14	80-1	0.887938	1.69109	0.0354861	89.1698	75.1549
56	cl-14	80-1	0.819443	1.96628	0.0325796	118.646	100.003
57	cl-14	80-2	0.836703	2.15482	0.0332936	117.039	98.6488
58	cl-14	80-2	0.878728	1.93109	0.0347468	138.999	117.161
63	cl-14	80-3	0.496935	1.9265	0.0192371	97.0039	81.759
73	cl-14	90-3	0.765212	1.24383	0.0294975	66.485	56.0319
LI-6800	hhmmss	leaf	E蒸腾	A净光合	gsw气孔导度	Qin外光强	Qabs叶光强
			mol m⁻² s⁻¹	µmol m⁻² s⁻¹	mol m⁻² s⁻¹	µmol m⁻² s⁻¹	µmol m⁻² s⁻¹
3	cl-16	0-1	0.257741	0.614436	0.00933558	56.8225	47.8863
4	cl-16	0-1	0.301074	0.401889	0.0109802	56.3007	47.4462
8	cl-16	0-2	0.133375	0.630312	0.00519218	54.7118	46.1067
9	cl-16	0-3	0.180278	0.476162	0.00702456	59.2685	49.9484
19	cl-16	30-2	0.157244	1.27045	0.00641837	43.2195	36.4196
24	cl-16	30-3	-0.0678164	0.517337	-0.00266819	87.4403	73.6974
28	cl-16	50-1	0.182375	1.1276	0.00730349	78.868	66.4708
29	cl-16	50-2	0.219611	1.2469	0.00879631	85.3332	71.9208
36	cl-16	50-3	0.0857724	1.02548	0.00352683	84.7625	71.4396
39	cl-16	70-1	0.302881	1.39943	0.012576	72.1528	60.8099
42	cl-16	70-2	0.222508	1.40848	0.00905945	74.8292	63.0662
48	cl-16	70-3	0.359724	0.918851	0.0143325	84.5286	71.2425
52	cl-16	80-1	0.591381	1.88543	0.0241506	67.6445	57.0095
55	cl-16	80-2	0.637925	2.1189	0.027168	93.9536	79.188
64	cl-16	90-1	0.676349	2.2525	0.0299174	78.0993	65.8227
66	cl-16	90-2	0.619357	1.45159	0.0272232	68.4245	57.6665
71	cl-16	90-3	0.42889	1.59122	0.0184104	69.7893	58.818
LI-6800	hhmmss	leaf	E蒸腾	A净光合	gsw气孔导度	Qin外光强	Qabs叶光强
			mol m⁻² s⁻¹	µmol m⁻² s⁻¹	mol m⁻² s⁻¹	µmol m⁻² s⁻¹	µmol m⁻² s⁻¹
9	cl-18	0-2	-0.783245	-0.668948	-0.0431534	4.93032	4.15617
13	cl-18	0-3	-0.431151	-0.665954	-0.023892	4.8756	4.10989
17	cl-18	30-1	-0.373022	-0.894168	-0.0205123	2.76256	2.32896
19	cl-18	30-2	-0.144699	-0.660547	-0.00813377	4.39678	3.70679
24	cl-18	30-3	-0.448254	-0.831626	-0.0246659	4.91816	4.14568
25	cl-18	30-3	-0.239117	-0.801645	-0.0133664	4.8814	4.11478
32	cl-18	50-2	-0.54139	-0.74286	-0.0293657	4.37353	3.68665
33	cl-18	50-2	-0.315623	-0.740072	-0.0172166	4.3786	3.69092
36	cl-18	50-3	-0.452375	-0.927864	-0.0247277	3.58626	3.02355
40	cl-18	70-1	-0.315193	-0.878195	-0.0173277	4.41403	3.7213
45	cl-18	70-2	-0.341015	-0.960689	-0.0187813	3.3259	2.80334
48	cl-18	70-3	-0.185571	-0.726395	-0.0104063	3.33501	2.81102
51	cl-18	80-1	-0.265199	-0.893532	-0.0154856	2.7466	2.31496
57	cl-18	80-2	-0.143516	-1.09818	-0.00810112	2.25028	1.89714
60	cl-18	80-3	-0.425625	-0.826037	-0.0244247	3.04558	2.5676
65	cl-18	90-1	-0.284574	-0.965022	-0.0159176	2.21667	1.86829
68	cl-18	90-2	-0.474853	-1.20754	-0.0276056	1.15876	0.976684
70	cl-18	90-3	-0.0157758	-1.05832	-0.000929452	1.47729	1.24542
73	cl-18	90-3	-0.251748	-1.23343	-0.0145651	0.912428	0.768846

## Sheet: fluorescence
	t for Fm	Fo	Fm	Fv	Fo/Fm	Fv/Fm	PI Inst.	Fv/Fo
1	400	7071	30842	23771	0.2293	0.771	2.2639	3.362
2	900	5745	27377	21632	0.2098	0.79	4.1153	3.765
3	500	6955	31355	24400	0.2218	0.778	2.8663	3.508
4	600	7708	33799	26091	0.2281	0.772	1.1951	3.385
5	600	7617	31026	23409	0.2455	0.754	1.8448	3.073
6	700	7569	33294	25725	0.2273	0.773	1.585	3.399
7	700	7113	34635	27522	0.2054	0.795	2.0266	3.869
8	600	6538	28615	22077	0.2285	0.772	2.4387	3.377
9	600	6029	28649	22620	0.2104	0.79	2.6143	3.752
10	500	7158	29318	22160	0.2442	0.756	0.9788	3.096
11	600	7518	32568	25050	0.2308	0.769	2.1864	3.332
12	600	6477	33407	26930	0.1939	0.806	2.2495	4.158
13	500	5980	30175	24195	0.1982	0.802	1.9582	4.046
14	300	5978	28456	22478	0.2101	0.79	1.9328	3.76
15	600	6913	34734	27821	0.199	0.801	1.799	4.024
16	600	6288	32613	26325	0.1928	0.807	3.8341	4.187
17	600	6454	34512	28058	0.187	0.813	3.626	4.347
18	600	6176	31582	25406	0.1956	0.804	3.4064	4.114
19	700	6761	30650	23889	0.2206	0.779	2.3788	3.533
20	600	7226	31149	23923	0.232	0.768	1.4969	3.311
21	400	6643	33835	27192	0.1963	0.804	2.3463	4.093
22	300	6575	34662	28087	0.1897	0.81	2.5625	4.272
23	400	6579	38303	31724	0.1718	0.828	3.694	4.822
24	500	6694	37839	31145	0.1769	0.823	2.3548	4.653
25	400	6652	31993	25341	0.2079	0.792	2.3538	3.81
26	600	6894	31425	24531	0.2194	0.781	1.7689	3.558
27	600	6144	30539	24395	0.2012	0.799	2.24	3.971
28	300	6835	31116	24281	0.2197	0.78	2.4117	3.552
29	290	6825	28900	22075	0.2362	0.764	1.3664	3.234
30	600	6597	30222	23625	0.2183	0.782	2.7559	3.581
31	600	7518	32568	25050	0.2308	0.769	2.1864	3.332
32	600	9483	36724	27241	0.2582	0.742	0.5616	2.873
33	800	7475	25781	18306	0.2899	0.71	0.7398	2.449
34	300	7720	27903	20183	0.2767	0.723	1.0462	2.614
35	300	10964	35657	24693	0.3075	0.693	0.3444	2.252
36	290	11080	31073	19993	0.3566	0.643	0.1807	1.804
37	400	8553	27494	18941	0.3111	0.689	0.9557	2.215
38	500	8215	36194	27979	0.227	0.773	2.3453	3.406
39	900	7894	24119	16225	0.3273	0.673	0.5075	2.055
40	400	9659	28545	18886	0.3384	0.662	0.3133	1.955
41	290	7947	26773	18826	0.2968	0.703	0.6433	2.369
42	700	8236	24511	16275	0.336	0.664	0.6057	1.976
43	400	9264	30252	20988	0.3062	0.694	0.4968	2.266
44	600	9558	24100	14542	0.3966	0.603	0.0417	1.521
45	700	8454	22691	14237	0.3726	0.627	0.093	1.684
46	600	11997	32160	20163	0.373	0.627	0.1062	1.681
47	300	8559	36078	27519	0.2372	0.763	1.1636	3.215
48	400	9513	30201	20688	0.315	0.685	0.3724	2.175
49	500	8027	28550	20523	0.2812	0.719	1.2972	2.557
50	300	12042	30353	18311	0.3967	0.603	0.1267	1.521
51	600	8997	27983	18986	0.3215	0.678	0.2363	2.11
52	300	9773	29989	20216	0.3259	0.674	0.2689	2.069
53	300	8713	29818	21105	0.2922	0.708	0.4427	2.422
54	300	12764	38155	25391	0.3345	0.665	0.1574	1.989
55	290	9972	31487	21515	0.3167	0.683	0.4123	2.158
56	500	9964	28230	18266	0.353	0.647	0.2957	1.833
57	300	9424	30596	21172	0.308	0.692	0.267	2.247
58	300	12433	33131	20698	0.3753	0.625	0.0804	1.665
59	300	8826	28392	19566	0.3109	0.689	0.2568	2.217
60	400	7018	28954	21936	0.2424	0.758	1.3414	3.126
61	300	8128	27047	18919	0.3005	0.699	0.6833	2.328
62	600	9094	33456	24362	0.2718	0.728	0.8763	2.679
63	290	12077	31900	19823	0.3786	0.621	0.1441	1.641
64	260	10966	26412	15446	0.4152	0.585	0.0984	1.409
65	290	7891	28111	20220	0.2807	0.719	0.8032	2.562
66	230	13139	34161	21022	0.3846	0.615	0.151	1.6
67	280	11429	28371	16942	0.4028	0.597	0.1772	1.482
68	500	11235	28551	17316	0.3935	0.606	0.233	1.541
69	400	8965	22578	13613	0.3971	0.603	0.2331	1.518
70	290	11087	29809	18722	0.3719	0.628	0.2282	1.689
71	290	8522	25963	17441	0.3282	0.672	0.5227	2.047
72	300	9624	23601	13977	0.4078	0.592	0.2023	1.452
73	290	9110	30357	21247	0.3001	0.7	0.4786	2.332
74	700	7869	23496	15627	0.3349	0.665	0.417	1.986
75	300	7574	23644	16070	0.3203	0.68	0.4944	2.122
76	500	10455	28787	18332	0.3632	0.637	0.1891	1.753
77	400	8458	30924	22466	0.2735	0.726	1.0064	2.656
78	400	9373	27434	18061	0.3417	0.658	0.526	1.927
79	700	7643	25463	17820	0.3002	0.7	1.1941	2.332
80	260	10849	32593	21744	0.3329	0.667	0.4886	2.004
81	290	9209	31685	22476	0.2906	0.709	0.6663	2.441
82	280	8423	26802	18379	0.3143	0.686	0.3912	2.182
83	300	8131	27194	19063	0.299	0.701	0.484	2.344
84	300	12834	30663	17829	0.4186	0.581	0.0686	1.389
85	290	7985	29908	21923	0.267	0.733	1.3887	2.746
86	400	8374	27061	18687	0.3094	0.691	0.4687	2.232
87	260	8792	27378	18586	0.3211	0.679	0.4775	2.114
88	250	11512	27888	16376	0.4128	0.587	0.0696	1.423
89	260	11244	27640	16396	0.4068	0.593	0.1156	1.458
90	270	9670	27418	17748	0.3527	0.647	0.2998	1.835
91	270	7871	29159	21288	0.2699	0.73	0.7024	2.705
92	400	8688	30586	21898	0.2841	0.716	1.4204	2.52
93	300	7201	26404	19203	0.2727	0.727	1.8934	2.667
94	240	7123	23564	16441	0.3023	0.698	1.0756	2.308
95	250	7931	26678	18747	0.2973	0.703	0.6813	2.364
96	400	9656	26452	16796	0.365	0.635	0.2018	1.739
97	400	8993	29568	20575	0.3041	0.696	1.0761	2.288
98	400	8228	20447	12219	0.4024	0.598	0.668	1.485
99	290	9158	27808	18650	0.3293	0.671	0.3361	2.036
100	240	7065	23863	16798	0.2961	0.704	1.3793	2.378
101	210	9679	25431	15752	0.3806	0.619	0.1609	1.627
102	290	7994	27047	19053	0.2956	0.704	0.7256	2.383
103	280	7862	26638	18776	0.2951	0.705	1.1633	2.388
104	280	7356	25018	17662	0.294	0.706	0.5861	2.401
105	270	8545	25534	16989	0.3347	0.665	0.3076	1.988
106	290	9057	28364	19307	0.3193	0.681	0.3827	2.132
107	400	7122	28703	21581	0.2481	0.752	2.8829	3.03
108	400	7185	30106	22921	0.2387	0.761	2.8704	3.19
109	400	7621	25801	18180	0.2954	0.705	1.1018	2.386
110	290	8044	28418	20374	0.2831	0.717	1.4811	2.533
111	280	8559	25473	16914	0.336	0.664	0.3792	1.976
112	260	7224	26881	19657	0.2687	0.731	0.9113	2.721
113	250	8718	28077	19359	0.3105	0.689	0.2792	2.221
114	250	8497	30015	21518	0.2831	0.717	0.9065	2.532
115	290	10475	29786	19311	0.3517	0.648	0.2368	1.844
116	250	8362	26967	18605	0.3101	0.69	0.6798	2.225
117	270	7666	27394	19728	0.2798	0.72	1.016	2.573
118	280	9746	25216	15470	0.3865	0.613	0.1126	1.587
119	260	8769	28051	19282	0.3126	0.687	0.3914	2.199
120	300	7289	25499	18210	0.2859	0.714	0.8515	2.498
121	300	7667	25081	17414	0.3057	0.694	0.5235	2.271
122	300	8708	22848	14140	0.3811	0.619	0.2722	1.624
123	240	8378	24241	15863	0.3456	0.654	0.5005	1.893
124	210	7564	22037	14473	0.3432	0.657	0.525	1.913
125	300	7370	25090	17720	0.2937	0.706	1.1804	2.404
126	270	9141	30100	20959	0.3037	0.696	0.3229	2.293
127	290	8151	25782	17631	0.3162	0.684	0.9249	2.163
128	290	10601	27099	16498	0.3912	0.609	0.1495	1.556
129	260	7434	22033	14599	0.3374	0.663	0.4426	1.964
130	290	7159	23516	16357	0.3044	0.696	0.5568	2.285
131	230	8025	19679	11654	0.4078	0.592	0.2144	1.452
132	280	7078	28524	21446	0.2481	0.752	0.7492	3.03
133	270	7236	25633	18397	0.2823	0.718	0.8391	2.542
134	280	6911	29600	22689	0.2335	0.767	1.4069	3.283
135	260	6588	27808	21220	0.2369	0.763	1.8878	3.221
136	280	6802	28785	21983	0.2363	0.764	2.0239	3.232
137	240	7348	28500	21152	0.2578	0.742	0.9335	2.879
138	240	6308	27591	21283	0.2286	0.771	1.4193	3.374
139	290	8865	34339	25474	0.2582	0.742	0.9684	2.874
140	290	7076	36030	28954	0.1964	0.804	2.1924	4.092
141	250	7376	29209	21833	0.2525	0.747	1.6171	2.96
142	280	8116	29016	20900	0.2797	0.72	1.3189	2.575
143	280	7279	25605	18326	0.2843	0.716	0.9178	2.518
144	300	6823	24117	17294	0.2829	0.717	1.4262	2.535
145	250	8352	29782	21430	0.2804	0.72	1.3543	2.566
146	300	7626	26062	18436	0.2926	0.707	1.5575	2.418
147	500	6199	26234	20035	0.2363	0.764	2.6431	3.232
148	290	6125	28949	22824	0.2116	0.788	2.9014	3.726
149	300	6077	31030	24953	0.1958	0.804	4.6315	4.106
150	280	10851	28611	17760	0.3793	0.621	0.1829	1.637
151	280	9619	23961	14342	0.4014	0.599	0.1703	1.491
152	250	8522	31636	23114	0.2694	0.731	1.1935	2.712
153	280	7314	26399	19085	0.2771	0.723	1.8796	2.609
154	300	7345	30238	22893	0.2429	0.757	2.7569	3.117
155	300	7796	31782	23986	0.2453	0.755	2.8349	3.077
156	400	8507	26952	18445	0.3156	0.684	0.9298	2.168
157	400	7974	28272	20298	0.282	0.718	1.1449	2.546
158	290	7922	28181	20259	0.2811	0.719	1.3753	2.557
159	300	7146	26388	19242	0.2708	0.729	1.7301	2.693
160	260	9025	28276	19251	0.3192	0.681	0.5608	2.133
161	300	7686	27747	20061	0.277	0.723	1.4816	2.61
162	300	7153	29716	22563	0.2407	0.759	2.3996	3.154
163	280	7181	28934	21753	0.2482	0.752	1.4663	3.029
164	270	6682	27707	21025	0.2412	0.759	1.7073	3.147
165	300	8265	32281	24016	0.256	0.744	1.7406	2.906
166	400	7158	32220	25062	0.2222	0.778	3.141	3.501
167	400	6628	29066	22438	0.228	0.772	3.6418	3.385
168	300	7958	30323	22365	0.2624	0.738	1.7704	2.81
169	300	7811	29951	22140	0.2608	0.739	0.9697	2.834
170	300	7493	30018	22525	0.2496	0.75	1.737	3.006
171	240	7495	29516	22021	0.2539	0.746	1.4104	2.938
172	250	7269	31363	24094	0.2318	0.768	1.4706	3.315
173	290	8566	36711	28145	0.2333	0.767	1.8543	3.286
174	290	7678	31893	24215	0.2407	0.759	2.2577	3.154
175	300	7747	29551	21804	0.2622	0.738	1.4209	2.815
176	300	7664	31039	23375	0.2469	0.753	1.9042	3.05
177	260	8121	30348	22227	0.2676	0.732	1.2836	2.737
178	290	6633	30415	23782	0.2181	0.782	2.2673	3.585
179	270	6792	28207	21415	0.2408	0.759	1.4984	3.153
180	290	6477	28767	22290	0.2252	0.775	2.8716	3.441
181	400	7293	33475	26182	0.2179	0.782	2.408	3.59
182	300	6847	28293	21446	0.242	0.758	1.9296	3.132
183	600	6558	31590	25032	0.2076	0.792	3.7511	3.817
184	300	6510	29378	22868	0.2216	0.778	2.5093	3.513
185	400	7853	34150	26297	0.23	0.77	1.3526	3.349
186	500	7241	29696	22455	0.2438	0.756	1.5663	3.101
187	500	6637	28487	21850	0.233	0.767	1.6948	3.292
188	500	6662	29396	22734	0.2266	0.773	2.0263	3.412
189	290	6979	29062	22083	0.2401	0.76	1.1853	3.164
190	300	7007	26782	19775	0.2616	0.738	0.6867	2.822
191	500	7064	28158	21094	0.2509	0.749	1.1562	2.986
192	500	7286	27893	20607	0.2612	0.739	0.7234	2.828
193	290	6315	28873	22558	0.2187	0.781	1.7223	3.572
194	300	6044	27374	21330	0.2208	0.779	1.265	3.529
195	500	6354	29435	23081	0.2159	0.784	2.083	3.633
196	500	6325	30475	24150	0.2075	0.792	3.0376	3.818
197	600	6841	31175	24334	0.2194	0.781	2.4057	3.557
198	400	6932	32122	25190	0.2158	0.784	2.6422	3.634
199	600	7264	32956	25692	0.2204	0.78	1.8092	3.537
200	500	7338	28385	21047	0.2585	0.741	0.6852	2.868
201	250	6736	32645	25909	0.2063	0.794	2.1163	3.846
202	500	7060	35359	28299	0.1997	0.8	1.8082	4.008
203	500	6741	35412	28671	0.1904	0.81	2.8275	4.253
204	400	6620	29369	22749	0.2254	0.775	1.7707	3.436
205	400	6716	29666	22950	0.2264	0.774	1.8144	3.417
206	400	6561	28975	22414	0.2264	0.774	1.738	3.416
207	300	6240	31145	24905	0.2004	0.8	2.632	3.991
208	280	6437	29362	22925	0.2192	0.781	1.9214	3.561
209	300	6344	29021	22677	0.2186	0.781	2.1709	3.575
210	300	6084	29593	23509	0.2056	0.794	2.8399	3.864

## Sheet: light response
obs	plant	leaf	E蒸腾	Emm	A净光合	gsw气孔导度	Qin控制光强	Qabs叶光强	Qamb_out自然光	Ci（胞间二氧化碳）			Qin	Emm	A净光合	gsw气孔导度	Ci胞间二氧化碳	Emm	A净光合	gsw气孔导度	Ci胞间二氧化碳	Emm	A净光合	gsw气孔导度	Ci胞间二氧化碳	average	Emm	A净光合			gsw气孔导度	Ci胞间二氧化碳
			mol m⁻² s⁻¹	mmol m⁻² s⁻¹	µmol m⁻² s⁻¹	mol m⁻² s⁻¹	µmol m⁻² s⁻¹	µmol m⁻² s⁻¹	µmol m⁻² s⁻¹	µmol mol⁻¹			µmol m⁻² s⁻¹	mmol m⁻² s⁻¹	µmol m⁻² s⁻¹	mol m⁻² s⁻¹	mol m⁻² s⁻¹	mmol m⁻² s⁻¹	µmol m⁻² s⁻¹	mol m⁻² s⁻¹	mol m⁻² s⁻¹	mmol m⁻² s⁻¹	µmol m⁻² s⁻¹	mol m⁻² s⁻¹	mol m⁻² s⁻¹		mmol m⁻² s⁻¹	µmol m⁻² s⁻¹	ｏｓｄ	ｓｄ	mol m⁻² s⁻¹	mol m⁻² s⁻¹
1	0.6	90-2	0.000894403	0.894403	0.381097	0.043605	1799.94	1517.33	60.6656	382.519		0-2	0	0.784778	-1.58726	0.0450382	455.115	0.270971	-1.27371	0.0202757	501.53	0	0	0	0	20%	0.527875	-1.43048	0.686378	0.840638	0.0326569	478.322
2	0.6	90-2	0.000780078	0.780078	0.625422	0.0397899	1500.02	1264.5	80.4036	372.007		30-2	1800	0.774106	1.4574	0.031883	321.506	0.461121	0.653587	0.0276028	361.243	0.5115	1.13595	0.029084	336.189		0.56865	0.454112	0.330339	0.404581	0.0303067	374.315
3	0.6	90-2	0.000697046	0.697046	0.632406	0.0377253	1200.01	1011.59	74.0698	371.065		30-3	1500	0.77318	1.75665	0.0326304	308.962	0.455836	0.665037	0.0276945	360.832	0.428566	0.958307	0.0249368	337.468		0.556558	0.958527	0.461277	0.564947	0.0288921	345.394
4	0.6	90-2	0.000651309	0.651309	0.83056	0.0365	1000.07	843.043	53.837	361.797			1200	0.74695	1.68272	0.032149	311.585	0.438942	0.700539	0.0272555	358.381	0.397586	0.752391	0.0242337	349.715		0.535009	1.02354	0.451279	0.552702	0.0281325	341.269
5	0.6	90-2	0.000594472	0.594472	0.726542	0.034692	799.952	674.344	56.1352	365.24			1000	0.711758	1.70854	0.0313448	308.453	0.365802	0.56255	0.0232038	361.003	0.394824	1.06559	0.025088	331.929		0.501848	1.09006	0.469007	0.574414	0.0269423	335.663
6	0.6	90-2	0.000561308	0.561308	0.692783	0.034024	599.881	505.685	55.1345	366.508			800	0.689053	1.66608	0.0314856	311.429	0.307599	1.06664	0.0200411	315.212	0.373431	1.05992	0.0245125	330.999		0.467983	1.22067	0.284175	0.348042	0.0257454	323.326
7	0.6	90-2	0.000513207	0.513207	0.522733	0.0323207	399.831	337.043	57.1688	373.697			600	0.678653	1.66776	0.031921	312.836	0.327079	0.96423	0.0219509	330.234	0.357193	0.880596	0.0244016	342.799		0.457727	1.18331	0.353014	0.432352	0.0260047	327.299
8	0.6	90-2	0.000437921	0.437921	0.418041	0.0291117	199.929	168.526	76.7914	377.154			400	0.626001	1.68399	0.0308687	309.812	0.281403	0.734724	0.0196011	340.86	0.291559	0.985981	0.0208822	325.526		0.414172	1.147	0.40159	0.491845	0.0243392	325.874
9	0.6	90-2	0.000420799	0.420799	0.0899902	0.029154	99.8588	84.1661	80.0737	395.605			200	0.562557	1.65611	0.0286413	305.067	0.2361	0.742956	0.017085	331.702	0.276858	0.75168	0.0209076	343.906		0.372422	1.07444	0.428423	0.524708	0.0227433	326.637
10	0.6	90-2	0.000390503	0.390503	-1.31555	0.0277322	50.1122	42.2295	55.8273	476.604			100	0.563614	1.02175	0.029031	341.154	0.243667	0.387667	0.0184195	367.771	0.271187	0.438901	0.021306	368.767		0.362722	0.730688	0.287594	0.352229	0.0228749	351.083
11	0.6	90-2	0.000362008	0.362008	-3.28072	0.0262074	0.0500021	0.0210018	53.3751	601.089			50	0.561943	0.407389	0.0291614	375.143	0.222844	0.378666	0.0174508	367.106	0.235756	-0.0191534	0.0188095	403.41		0.345816	0.374397	0.194657	0.238406	0.0220741	374.185
12	0.6	90-3	0.00610541	6.10541	-971.01	0.649263	0.0500021	0.0210018	21.3545	3397.46			0	0.548635	-1.43504	0.0285597	477.515	0.22461	-1.13207	0.0179886	502.285	0.22172	-2.0216	0.0182319	578.969		0.335195	-1.05358	0.369251	0.452238	0.0217136	483.239
13	0.6	90-3	0.000611138	0.611138	0.867214	0.0331947	1800.06	1517.44	67.4612	356.188
14	0.6	90-3	0.000578409	0.578409	0.750341	0.0324932	1499.99	1264.48	65.7238	361.362		50-1	0	0	0	0	0	0.622097	-1.72475	0.0478356	459.544	0	0	0	0	40%	0.622097	-1.72475	0.813054	0.995784	0.0478356	459.544
15	0.6	90-3	0.00050651	0.50651	1.03302	0.0295256	1200.09	1011.66	63.0737	342.894		70-1	1800	1.4659	4.52024	0.0601903	273.268	0.809869	2.97434	0.0414727	282.247	0.723325	1.43838	0.0405057	341.291		0.905298	1.80205	1.25816	1.54093	0.0475011	339.088
16	0.6	90-3	0.000474112	0.474112	1.09599	0.0287143	999.876	842.881	67.5601	338.217		70-3	1500	1.38488	4.20739	0.0587003	279.215	0.747888	3.53641	0.0390679	252.66	0.673847	1.62926	0.0385068	330.671		0.927979	2.79378	1.0921	1.33755	0.045944	300.408
17	0.6	90-3	0.000444155	0.444155	0.998265	0.027779	800.046	674.423	66.1416	342.069			1200	1.241	4.31496	0.0545641	268.065	0.699115	3.09361	0.0381664	268.202	0.649477	1.9102	0.0383415	318.973		0.879393	3.02814	0.981777	1.20243	0.044254	288.912
18	0.6	90-3	0.000400296	0.400296	1.0411	0.0262042	600.004	505.789	58.2134	336.511			1000	1.17495	4.18528	0.0535942	270.097	0.617012	3.27374	0.034824	248.012	0.594885	1.62939	0.0362368	327.115		0.81656	3.02914	1.05764	1.29533	0.0422273	283.534
19	0.6	90-3	0.000366726	0.366726	0.964812	0.0250229	400.135	337.298	56.685	338.764			800	1.17482	4.16699	0.0546188	273.185	0.54391	3.05322	0.0319823	246.258	0.524665	1.85743	0.0331704	309.955		0.764988	3.0267	0.943074	1.15502	0.0404997	278.233
20	0.6	90-3	0.000313204	0.313204	1.06425	0.0226137	200.215	168.766	61.7981	325.817			600	1.12295	3.81474	0.0533741	281.219	0.486063	2.72419	0.0298795	253.541	0.472189	1.88674	0.0311027	302.939		0.711548	2.86309	0.789361	0.966765	0.038714	278.983
21	0.6	90-3	0.000296679	0.296679	0.480607	0.0222396	99.9775	84.2655	65.8667	366.769			400	1.00889	3.90728	0.0497752	270.626	0.41017	2.70394	0.0265355	237.071	0.423632	2.16862	0.029095	281.208		0.638561	2.91073	0.727059	0.890461	0.0360299	266.972
22	0.6	90-3	0.000272749	0.272749	-0.594352	0.0208432	50.0763	42.1991	60.2037	446.973			200	0.876235	3.4667	0.0460616	276.783	0.36973	2.15344	0.0253168	264.502	0.356861	1.68162	0.026164	298.25		0.560347	2.55312	0.755264	0.925005	0.0333931	276.627
23	0.6	90-3	0.000262514	0.262514	-2.48513	0.0205726	0.0500021	0.0210018	61.4683	594.526			100	0.900946	1.66844	0.0483545	342.168	0.356835	1.83817	0.0253685	285.026	0.390354	0.883067	0.0298056	353.885		0.552121	1.7357	0.416047	0.509551	0.0342304	314.426
25	40%	70-3	0.00587071	5.87071	-396.654	0.663922	0.0500021	0.0210018	60.3687	1605.75			50	0.844404	0.680961	0.0454922	373.78	0.317009	0.572795	0.0231103	361.402	0.379154	-0.180428	0.0293645	411.287		0.523172	0.702257	0.383121	0.469226	0.0330494	365.224
26	40%	70-3	0.000723325	0.723325	1.43838	0.0405057	1799.99	1517.38	73.2341	341.291			0	0.839032	-1.34481	0.0457627	445.17	0.284655	-1.37465	0.0212676	504.437	0.344837	-1.8369	0.0272964	509.52		0.497924	-0.963527	0.22527	0.275898	0.031844	456.088
27	40%	70-3	0.000673847	0.673847	1.62926	0.0385068	1500.12	1264.59	74.2787	330.671
28	40%	70-3	0.000649477	0.649477	1.9102	0.0383415	1199.92	1011.52	79.5789	318.973		80-1	0	-0.78635	-4.56967	-0.0602054	284.515	0.19137	-1.89339	0.0163047	587.594	0	0	0	0	60%	0.19137	-1.89339	1.87466	2.29599	0.0163047	587.594
29	40%	70-3	0.000594885	0.594885	1.62939	0.0362368	1000.03	843.01	82.119	327.115		80-3	1800	1.52494	3.59403	0.0670331	308.432	1.11765	2.40263	0.068878	342.59	0.611138	0.867214	0.0331947	356.188		1.08458	2.28796	1.11617	1.36702	0.0563686	335.737
30	40%	70-3	0.000524665	0.524665	1.85743	0.0331704	800.152	674.513	80.7994	309.955		90-3	1500	1.43386	3.49604	0.0628904	305.397	0.99812	2.56004	0.0610365	331.306	0.578409	0.750341	0.0324932	361.362		1.00346	2.2688	1.13968	1.39582	0.05214	332.688
31	40%	70-3	0.000472189	0.472189	1.88674	0.0311027	599.982	505.77	75.1694	302.939			1200	1.34648	3.35685	0.0592898	303.968	0.952204	2.52845	0.0596042	330.788	0.50651	1.03302	0.0295256	342.894		0.935064	2.30611	0.961641	1.17776	0.0494732	325.883
32	40%	70-3	0.000423632	0.423632	2.16862	0.029095	399.807	337.023	69.3635	281.208			1000	1.27261	3.03379	0.0567418	309.252	0.906028	2.6025	0.0580926	327.217	0.474112	1.09599	0.0287143	338.217		0.884252	2.24409	0.830708	1.0174	0.0478496	324.895
33	40%	70-3	0.000356861	0.356861	1.68162	0.026164	200.057	168.633	74.9825	298.25			800	1.17025	2.94955	0.0531908	306.439	0.838987	3.01491	0.0548712	311.157	0.444155	0.998265	0.027779	342.069		0.817799	2.32091	0.935632	1.14591	0.0452803	319.888
34	40%	70-3	0.000390354	0.390354	0.883067	0.0298056	100.183	84.4387	75.7632	353.885			600	1.05756	2.97544	0.0492707	299.049	0.775994	2.48431	0.0522706	323.391	0.400296	1.0411	0.0262042	336.511		0.744616	2.16695	0.820958	1.00546	0.0425818	319.65
35	40%	70-3	0.000379154	0.379154	-0.180428	0.0293645	50.0424	42.1706	59.8848	411.287			400	0.933546	2.74857	0.0453905	299.409	0.719218	2.66162	0.0498264	314.294	0.366726	0.964812	0.0250229	338.764		0.673163	2.125	0.821146	1.00569	0.0400799	317.489
36	40%	70-3	0.000344837	0.344837	-1.8369	0.0272964	0.0500021	0.0210018	65.7458	509.52			200	0.819596	2.45915	0.0417137	302.7	0.692095	2.19806	0.0503201	330.354	0.313204	1.06425	0.0226137	325.817		0.608298	1.90715	0.605478	0.741556	0.0382158	319.624
37	20%	30-3	0.00493264	4.93264	-285.559	0.557218	0.0500021	0.0210018	53.2542	1399.83			100	0.793298	1.47274	0.0411243	339.948	0.645807	1.72839	0.0488549	344.126	0.296679	0.480607	0.0222396	366.769		0.578595	1.22725	0.538171	0.659122	0.0374063	350.281
38	20%	30-3	0.0005115	0.5115	1.13595	0.029084	1799.94	1517.33	71.4198	336.189			50	0.670224	0.495016	0.0352347	375.12	0.663251	0.640554	0.0507223	380.94	0.272749	-0.594352	0.0208432	446.973		0.535408	0.180406	0.551049	0.674895	0.0356001	401.011
39	20%	30-3	0.000428566	0.428566	0.958307	0.0249368	1499.93	1264.43	69.358	337.468			0	0.68127	-1.87191	0.0365653	479.621	0.618198	-1.35661	0.047584	447.459	0.262514	-2.48513	0.0205726	594.526		0.520661	-1.90455	0.461297	0.564972	0.0349073	507.202
40	20%	30-3	0.000397586	0.397586	0.752391	0.0242337	1200.02	1011.6	79.4469	349.715
41	20%	30-3	0.000394824	0.394824	1.06559	0.025088	1000.02	843.002	73.8389	331.929
42	20%	30-3	0.000373431	0.373431	1.05992	0.0245125	800.135	674.498	81.5087	330.999
43	20%	30-3	0.000357193	0.357193	0.880596	0.0244016	600.004	505.789	72.8767	342.799
44	20%	30-3	0.000291559	0.291559	0.985981	0.0208822	400.089	337.259	71.0624	325.526
45	20%	30-3	0.000276858	0.276858	0.75168	0.0209076	199.847	168.456	63.6125	343.906
46	20%	30-3	0.000271187	0.271187	0.438901	0.021306	100.204	84.4564	60.6436	368.767
47	20%	30-3	0.000235756	0.235756	-0.0191534	0.0188095	50.0539	42.1803	61.1934	403.41
48	20%	30-3	0.00022172	0.22172	-2.0216	0.0182319	0.0500021	0.0210018	72.7393	578.969
49	60%	80-3	0.00019137	0.19137	-1.89339	0.0163047	0.0500021	0.0210018	45.7438	587.594
50	60%	80-3	0.00111765	1.11765	2.40263	0.068878	1800.1	1517.47	69.4405	342.59
51	60%	80-3	0.00099812	0.99812	2.56004	0.0610365	1500.15	1264.61	87.584	331.306
52	60%	80-3	0.000952204	0.952204	2.52845	0.0596042	1200.13	1011.69	103.748	330.788
53	60%	80-3	0.000906028	0.906028	2.6025	0.0580926	1000.03	843.01	123.036	327.217
54	60%	80-3	0.000838987	0.838987	3.01491	0.0548712	799.993	674.379	128.341	311.157
55	60%	80-3	0.000775994	0.775994	2.48431	0.0522706	600.11	505.878	142.878	323.391
56	60%	80-3	0.000719218	0.719218	2.66162	0.0498264	400.075	337.248	151.691	314.294
57	60%	80-3	0.000692095	0.692095	2.19806	0.0503201	199.974	168.564	149.712	330.354
58	60%	80-3	0.000645807	0.645807	1.72839	0.0488549	99.9094	84.2086	147.898	344.126
59	60%	80-3	0.000663251	0.663251	0.640554	0.0507223	50.026	42.1568	157.794	380.94
60	60%	80-3	0.000618198	0.618198	-1.35661	0.047584	0.0500021	0.0210018	162.468	447.459
61	40%	70-1	0.000622097	0.622097	-1.72475	0.0478356	0.0500021	0.0210018	164.007	459.544
62	40%	70-1	0.000809869	0.809869	2.97434	0.0414727	1799.85	1517.26	107.08	282.247
63	40%	70-1	0.000747888	0.747888	3.53641	0.0390679	1499.87	1264.38	118.813	252.66
64	40%	70-1	0.000699115	0.699115	3.09361	0.0381664	1199.96	1011.55	126.873	268.202
65	40%	70-1	0.000617012	0.617012	3.27374	0.034824	999.922	842.92	142.086	248.012
66	40%	70-1	0.00054391	0.54391	3.05322	0.0319823	800.2	674.553	135.681	246.258
67	40%	70-1	0.000486063	0.486063	2.72419	0.0298795	599.926	505.723	127.896	253.541
68	40%	70-1	0.00041017	0.41017	2.70394	0.0265355	400.206	337.358	123.937	237.071
69	40%	70-1	0.00036973	0.36973	2.15344	0.0253168	199.863	168.469	128.424	264.502
70	40%	70-1	0.000356835	0.356835	1.83817	0.0253685	100.127	84.3923	123.981	285.026
71	40%	70-1	0.000317009	0.317009	0.572795	0.0231103	50.0047	42.1387	114.612	361.402
72	40%	70-1	0.000284655	0.284655	-1.37465	0.0212676	0.0500021	0.0210018	111.94	504.437
73	20%	30-2	0.000270971	0.270971	-1.27371	0.0202757	0.0500021	0.0210018	110.923	501.53
74	20%	30-2	0.000461121	0.461121	0.653587	0.0276028	1800.01	1517.39	107.861	361.243
75	20%	30-2	0.000455836	0.455836	0.665037	0.0276945	1499.98	1264.47	102.275	360.832
76	20%	30-2	0.000438942	0.438942	0.700539	0.0272555	1199.94	1011.53	106.288	358.381
77	20%	30-2	0.000365802	0.365802	0.56255	0.0232038	999.879	842.883	117.219	361.003
78	20%	30-2	0.000307599	0.307599	1.06664	0.0200411	799.966	674.357	122.431	315.212
79	20%	30-2	0.000327079	0.327079	0.96423	0.0219509	599.801	505.618	122.739	330.234
80	20%	30-2	0.000281403	0.281403	0.734724	0.0196011	399.964	337.155	124.564	340.86
81	20%	30-2	0.0002361	0.2361	0.742956	0.017085	200.013	168.596	127.907	331.702
82	20%	30-2	0.000243667	0.243667	0.387667	0.0184195	100.047	84.3239	136.495	367.771
83	20%	30-2	0.000222844	0.222844	0.378666	0.0174508	50.0117	42.1454	145.841	367.106
84	20%	30-2	0.00022461	0.22461	-1.13207	0.0179886	0.0500021	0.0210018	150.454	502.285
87	60%	80-1	-0.00078635	-0.78635	-4.56967	-0.0602054	0.0500021	0.0210018	191.316	284.515
88	60%	80-1	0.00152494	1.52494	3.59403	0.0670331	1800.06	1517.44	211.202	308.432
89	60%	80-1	0.00143386	1.43386	3.49604	0.0628904	1500.11	1264.58	192.311	305.397
90	60%	80-1	0.00134648	1.34648	3.35685	0.0592898	1199.86	1011.47	182.184	303.968
91	60%	80-1	0.00127261	1.27261	3.03379	0.0567418	1000.02	843.002	175.399	309.252
92	60%	80-1	0.00117025	1.17025	2.94955	0.0531908	799.824	674.237	172.172	306.439
93	60%	80-1	0.00105756	1.05756	2.97544	0.0492707	599.816	505.63	168.241	299.049
94	60%	80-1	0.000933546	0.933546	2.74857	0.0453905	399.969	337.159	165.464	299.409
95	60%	80-1	0.000819596	0.819596	2.45915	0.0417137	200.011	168.594	172.227	302.7
96	60%	80-1	0.000793298	0.793298	1.47274	0.0411243	99.8072	84.1225	165.574	339.948
97	60%	80-1	0.000670224	0.670224	0.495016	0.0352347	50.002	42.1373	164.035	375.12
98	60%	80-1	0.00068127	0.68127	-1.87191	0.0365653	0.0500021	0.0210018	184.46	479.621
99	40%	50-1	-0.00307984	-3.07984	-172.688	-0.166446	0.0500021	0.0210018	213.435	-1127.55
100	40%	50-1	0.0014659	1.4659	4.52024	0.0601903	1799.92	1517.32	159.982	273.268
101	40%	50-1	0.00138488	1.38488	4.20739	0.0587003	1499.99	1264.48	131.843	279.215
102	40%	50-1	0.001241	1.241	4.31496	0.0545641	1200	1011.58	115.822	268.065
103	40%	50-1	0.00117495	1.17495	4.18528	0.0535942	1000.02	843.002	95.4573	270.097
104	40%	50-1	0.00117482	1.17482	4.16699	0.0546188	799.961	674.353	83.9663	273.185
105	40%	50-1	0.00112295	1.12295	3.81474	0.0533741	599.859	505.666	72.9372	281.219
106	40%	50-1	0.00100889	1.00889	3.90728	0.0497752	400.073	337.246	62.37	270.626
107	40%	50-1	0.000876235	0.876235	3.4667	0.0460616	200.003	168.588	51.7037	276.783
108	40%	50-1	0.000900946	0.900946	1.66844	0.0483545	100.03	84.3096	42.0381	342.168
109	40%	50-1	0.000844404	0.844404	0.680961	0.0454922	49.999	42.1348	36.5071	373.78
110	40%	50-1	0.000839032	0.839032	-1.34481	0.0457627	0.0500021	0.0210018	35.347	445.17
111	20%	0-2	0.000784778	0.784778	-1.58726	0.0450382	0.0500021	0.0210018	33.2303	455.115
112	20%	0-2	0.000774106	0.774106	1.4574	0.031883	1800	1517.38	35.7374	321.506
113	20%	0-2	0.00077318	0.77318	1.75665	0.0326304	1499.97	1264.46	40.7956	308.962
114	20%	0-2	0.00074695	0.74695	1.68272	0.032149	1200.14	1011.7	40.7406	311.585
115	20%	0-2	0.000711758	0.711758	1.70854	0.0313448	1000.03	843.01	47.0084	308.453
116	20%	0-2	0.000689053	0.689053	1.66608	0.0314856	800.053	674.43	46.1342	311.429
117	20%	0-2	0.000678653	0.678653	1.66776	0.031921	599.907	505.707	47.7231	312.836
118	20%	0-2	0.000626001	0.626001	1.68399	0.0308687	400.163	337.322	50.912	309.812
119	20%	0-2	0.000562557	0.562557	1.65611	0.0286413	200	168.585	53.661	305.067
120	20%	0-2	0.000563614	0.563614	1.02175	0.029031	100.033	84.3121	56.0032	341.154
121	20%	0-2	0.000561943	0.561943	0.407389	0.0291614	50.0071	42.1416	59.379	375.143
122	20%	0-2	0.000548635	0.548635	-1.43504	0.0285597	0.0500021	0.0210018	62.8263	477.515

## Sheet: deal
5.25		average							5.25						5.28							6.14							average	osd
日动态	遮光	E	A	gsw	控水	E	A	gsw	控水荧光	遮光	fv/fm	控水	fv/fm		水浴荧光	控水	水温	水浴前	水浴后	24h后		叶重	控水	水温	叶片鲜重	叶片干重	含水量	含水率	叶片鲜重		叶片干重		含水量
	0	-0.000267976	0.36469	-0.0294263	0.2	-0.000419301	0.651064	-0.0444591		0	0.773	0.2	0.7751			0.2	27℃	0.7925	0.7775	0.7875			0.2	27℃	0.1906	0.048	0.1426	0.748164	0.208	0.0638592	0.0508571	0.00917183	0.157143	0.0549437
	30	-0.000589541	0.973235	-0.061371	0.4	-0.000555178	1.2779	-0.0558641		30	0.7772	0.4	0.7939				37℃	0.7925	0.7775	0.7925				37℃	0.2	0.052	0.148	0.74
6点	50	-0.000427971	1.38294	-0.0424619	0.6	-0.00043324	1.47134	-0.0409955		50	0.7936	0.6	0.7963				40℃	0.8	0.78	0.795				40℃	0.1744	0.049	0.1254	0.719037
	70	-0.000736901	1.12784	-0.0750101			（6和8在origin数据对调）			70	0.7942						43℃	0.8	0.78	0.7925				43℃	0.3622	0.072	0.2902	0.801215
	80	-0.000475992	1.48216	-0.0454338						80	0.8114						46℃	0.79	0.64	0.5975				46℃	0.186	0.048	0.138	0.741935
	90	-0.000390489	1.46052	-0.0365572						90	0.7812						49℃	0.7925	0.555	0.3775				49℃	0.164	0.041	0.123	0.75
																	51℃	0.7825	0.4675	0.2				51℃	0.1788	0.046	0.1328	0.742729
	0	-0.00106688	-6.38972	-0.11507	0.2	-0.000959488	-5.9567	-0.0982958		0	0.7274	0.2	0.7077			0.4	27℃	0.8225	0.815	0.8225			0.4	27℃	0.5258	0.098	0.4278	0.813617	0.304957	0.116313	0.0655714	0.0161055	0.239386	0.100504
	30	-0.000861857	-5.56304	-0.0830469	0.4	-0.000820982	-3.44996	-0.0731834		30	0.688	0.4	0.6688				37℃	0.8075	0.8025	0.8075				37℃	0.1758	0.048	0.1278	0.726962
8点	50	-0.00108818	-4.11432	-0.0976413	0.6	-0.000698353	-2.30913	-0.0563892		50	0.6582	0.6	0.6819				40℃	0.815	0.8	0.805				40℃	0.384	0.071	0.313	0.815104
	70	-0.000602365	-2.90639	-0.0531724						70	0.6794						43℃	0.8025	0.7775	0.7925				43℃	0.3693	0.076	0.2933	0.794205
	80	-0.000458011	-2.04982	-0.0384352						80	0.6816						46℃	0.805	0.7225	0.7275				46℃	0.2432	0.054	0.1892	0.777961
	90	-0.000938696	-2.56844	-0.0743433						90	0.6822						49℃	0.7975	0.5475	0.4125				49℃	0.2146	0.056	0.1586	0.739049
																	51℃	0.805	0.2	0.2225				51℃	0.222	0.056	0.166	0.747748
	0	0.000241969	2.36322	0.0123997	0.2	0.000163228	2.18276	0.00831176		0	0.6704	0.2	0.6401			0.6	27℃	0.82	0.7975	0.815			0.6	27℃	0.1592	0.046	0.1132	0.711055	0.218071	0.0320829	0.055	0.00609449	0.163071	0.0269236
	30	4.51163e-05	1.91207	0.00217978	0.4	8.79299e-06	2.28105	0.000535374		30	0.6098	0.4	0.6697				37℃	0.8075	0.7975	0.81				37℃	0.2394	0.057	0.1824	0.761905
10点	50	7.59653e-05	2.66347	0.00378786	0.6	0.000297767	3.21701	0.0146904		50	0.6618	0.6	0.6607				40℃	0.8175	0.7925	0.815				40℃	0.1872	0.046	0.1412	0.754274
	70	5.905e-05	2.32455	0.00294514						70	0.6776						43℃	0.8175	0.78	0.8				43℃	0.2504	0.063	0.1874	0.748403
	80	0.000312102	3.4023	0.0154779						80	0.682						46℃	0.8125	0.7425	0.7				46℃	0.2149	0.056	0.1589	0.739414
	90	0.000274831	2.92054	0.0134302						90	0.6394						49℃	0.8	0.4925	0.3925				49℃	0.2536	0.057	0.1966	0.775237
																	51℃	0.7925	0.225	0.2075				51℃	0.2218	0.06	0.1618	0.729486
	0	-0.000935976	1.15469	-0.0356338	0.2	-0.000665183	0.847537	-0.0259569		0	0.7148	0.2	0.6868			苗圃（65%）	27℃	0.823333	0.81	0.823333			苗圃（65%）	27℃	0.1561	0.035	0.1211	0.775785	0.205957		0.0521905		0.153767
	30	-0.000367311	0.509669	-0.0153122	0.4	-0.000887141	1.82324	-0.0356435		30	0.6608	0.4	0.7015				37℃	0.796667	0.793333	0.783333				37℃	0.2317	0.069	0.1627	0.702201
12点	50	-0.000611899	1.97067	-0.0240397	0.6	-0.000698586	1.19321	-0.0286899		50	0.6798	0.6	0.6873				40℃	0.79	0.77	0.793333				40℃	0.1162	0.032	0.0842	0.724613
	70	-0.00119679	1.65738	-0.0486977						70	0.7232						43℃	0.8	0.766667	0.77				43℃	0.3744	0.068	0.3064	0.818376
	80	-0.000699606	0.772445	-0.0278614						80	0.6898						46℃	0.803333	0.683333	0.626667				46℃	0.2845	0.069	0.2155	0.757469
	90	-0.000697422	1.67408	-0.0296367						90	0.6848						49℃	0.81	0.543333	0.533333				49℃	0.1498	0.043	0.1068	0.712951
																	51℃	0.806667	0.543333	0.563333				51℃	0.129	0.0493333	0.0796667	0.608622
	0	0.000157612	0.838869	0.00533334	0.2	0.000124997	0.526042	0.00416621		0	0.666	0.2	0.6678
	30	9.89042e-05	0.275781	0.0032325	0.4	0.000232797	1.38607	0.008853		30	0.6696	0.4	0.7415
14点	50	0.000214701	1.09202	0.00791743	0.6	0.000615431	1.58393	0.0242543		50	0.7184	0.6	0.7304
	70	0.000264464	1.90065	0.0104902						70	0.7646
	80	0.000822382	1.85321	0.0325968						80	0.724
	90	0.000305006	1.18001	0.0117407						90	0.7368
	0	0.000190266	0.62424	0.00699439	0.2	0.000122802	0.632601	0.00461939		0	0.713	0.2	0.7096
	30	2.83508e-05	0.644306	0.00129439	0.4	0.000210675	1.17286	0.00855212		30	0.7062	0.4	0.7514
16点	50	8.02693e-05	1.03541	0.0032338	0.6	0.00051774	1.76279	0.0222639		50	0.7474	0.6	0.7579
	70	0.00032478	1.29313	0.0132057						70	0.7554
	80	0.0005039	1.90414	0.0211944						80	0.7556
	90	0.000531581	1.62143	0.0233333						90	0.7602
	0	-0.000842938	-1.00125	-0.0448243	0.2	-0.000702447	-1.10454	-0.0377246		0	0.776	0.2	0.7674
	30	-0.000544395	-1.22074	-0.0297374	0.4	-0.000489452	-1.10504	-0.0265843		30	0.7588	0.4	0.771
18点	50	-0.000569875	-1.24165	-0.0308098	0.6	-0.00130022	-3.03222	-0.0665347		50	0.7664	0.6	0.7883
	70	-0.000409028	-0.968433	-0.0223588						70	0.7756
	80	-0.000915638	-1.34243	-0.0499876						80	0.7906
	90	-0.000751944	-1.36876	-0.0418104						90	0.786
							-5.9567	-3.44996	-2.30913		0.7751	0.7939	0.7963
							0.65106	1.2779	1.47134		0.7077	0.6688	0.6819
							2.18276	2.28105	3.21701		0.6401	0.6697	0.6607
							0.84754	1.82324	1.19321		0.6878	0.7015	0.6873
							0.52604	1.38607	1.58393		0.6678	0.7415	0.7304
							0.6326	1.17286	1.76279		0.7096	0.7514	0.7579
							-1.10454	-1.10504	-3.03222		0.7674	0.771	0.7883
